# Supplementary material for: ddRADseq reveals determinants for temperature-dependent sex reversal in Nile tilapia on LG23
Source: PubMed Central journal article supplement (PMC5513378; doi:10.1186/s12864-017-3930-0), 2017-07-14

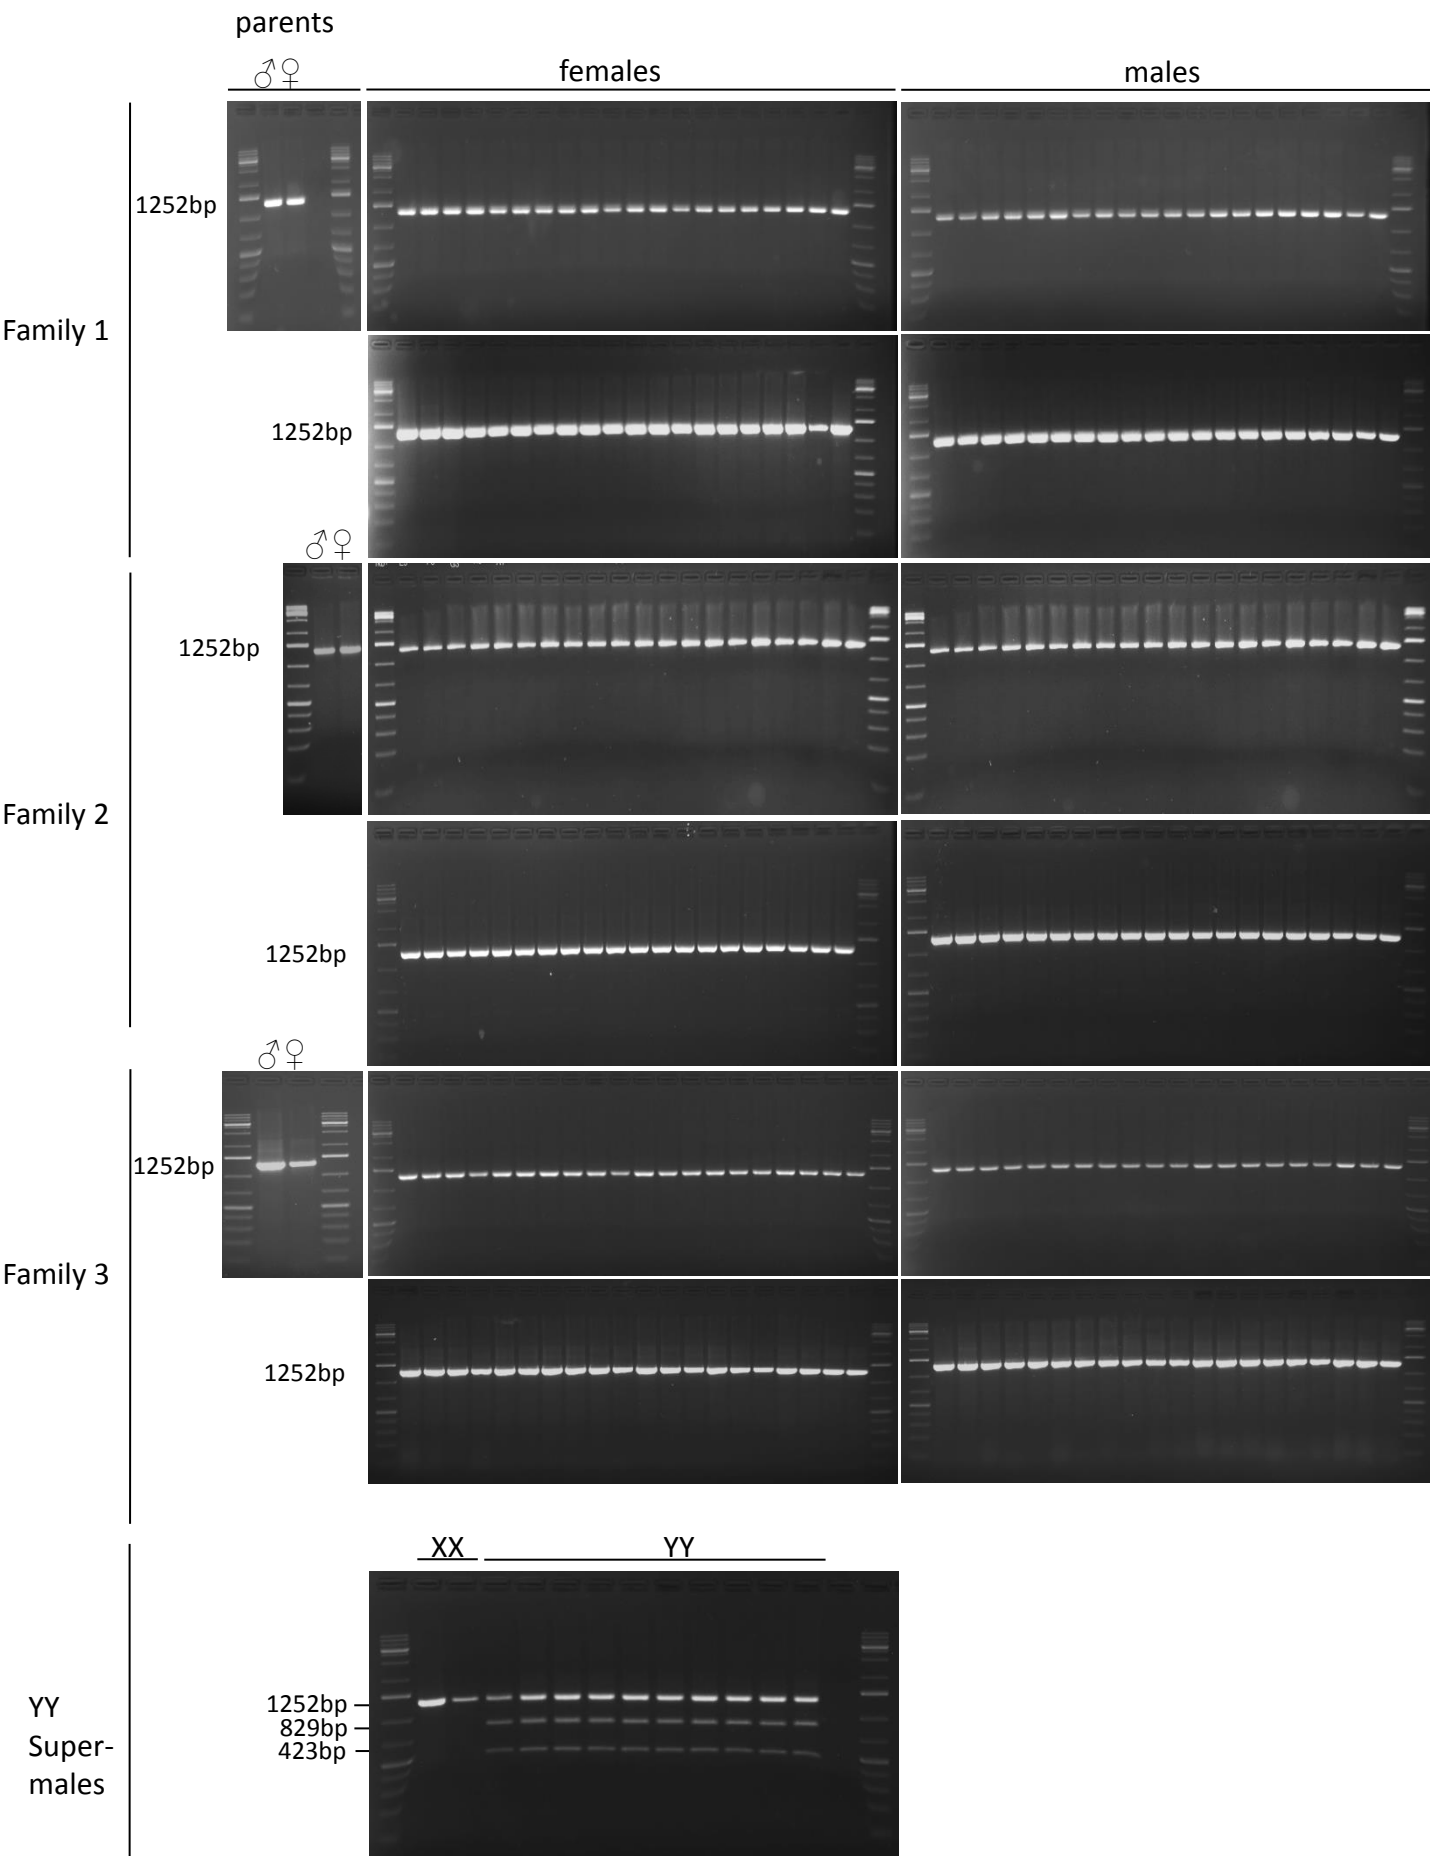

Supplement: 12864_2017_3930_MOESM1_ESM.pdf [file 12864_2017_3930_MOESM1_ESM.pdf]
